# Supplementary material for: Synthesis and evaluation of UiO-66@MIP towards norfloxacin in water
Source: Royal Society of Chemistry journal article supplement (doi:10.1039/d2ra02726g), 2022-01-01
Supplement: d2ra02726g1.pdf [file d2ra02726g1.pdf]

1 **Supporting Information**

2 **Removal and detection of norfloxacin in water by UiO-66@MIP**

3

4 Wu Zixuan<sup>1</sup>, Zhang Sixue<sup>1</sup>, Liu Wanqiong<sup>2,3</sup>, Peng Zhihua<sup>2</sup>, Dong Yanshan<sup>2</sup>, Huang

5 Zeyu<sup>2</sup>, Zhong Mingmin<sup>1</sup>, Liang Yong<sup>1,\*</sup>, Ye Youai<sup>1</sup>

6

7 <sup>1</sup> Department of Analytical Chemistry, Faculty of Chemistry, South China Normal

8 University, Guangzhou, China

9 <sup>2</sup> Foshan Sanshui Foshui Water Supply Co., Ltd, Foshan, China

10

11 \*Corresponding author: Dr. Liang Yong

12 E-mail addresses: [liangy@scnu.edu.cn](mailto:liangy@scnu.edu.cn)

13

14

15

16

17

18

19

20

21

22

23 **1. Synthesis of MIP without UiO-66-NH<sub>2</sub>**

24 51 mg of NOR and 68  $\mu$ L of MAA were dissolved into 50 mL of acetonitrile. The  
25 mixture was stirred for 2 h at room temperature. After the reaction system was heated  
26 to 60  $^{\circ}$ C, 400  $\mu$ L EGDMA and 70 mg AIBN were added to the solution. The mixture  
27 reacted at 60 degrees for 24 hours. After the reaction, the precipitate was collected with  
28 a centrifuge at 9000 rpm, then washed with methanol /acetic acid (90:10, v/v) until the  
29 template was removed. Finally, the product was dried at 60  $^{\circ}$ C under vacuum.

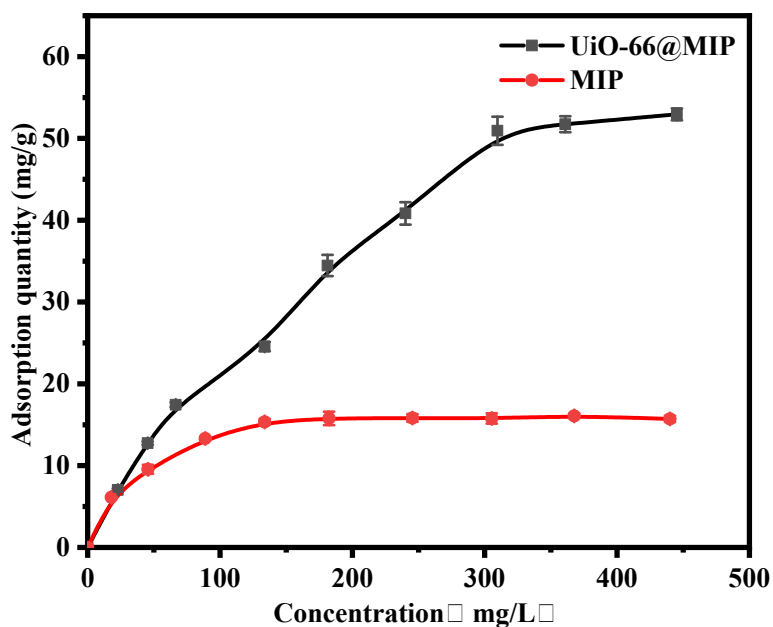

30

31 Figure S1. The static adsorption curves of UiO-66@MIP and MIP without UiO-66-NH<sub>2</sub>

32

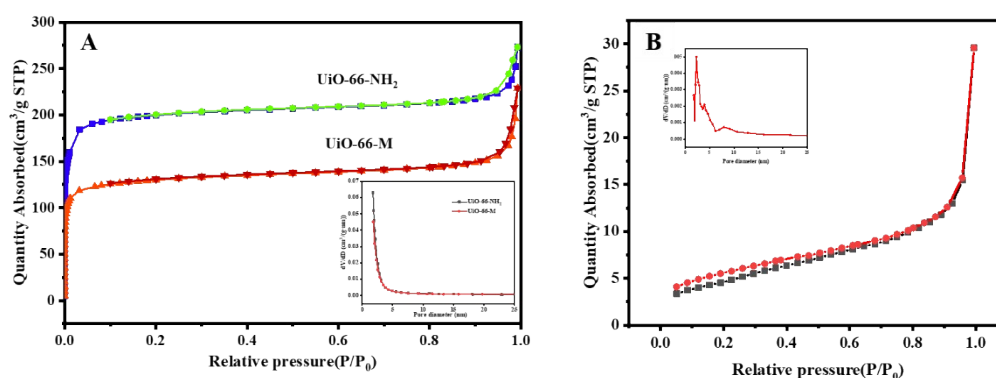

33

34 Figure S2. (A) N<sub>2</sub> sorption isotherms of UiO-66-NH<sub>2</sub> and UiO-66-M and their pore  
 35 sizes distribution; (B) N<sub>2</sub> sorption isotherms of UiO-66@MIP and its pore sizes  
 36 distribution

37

38 Table S1 Isotherm parameters obtained by the Langmuir and Freundlich isotherm  
 39 models.

| Materials             | UiO-66@NIP | UiO-66@MIP |
|-----------------------|------------|------------|
| <b>Freundlich</b>     |            |            |
| 1/n                   | 0.56       | 0.42       |
| Log K <sub>F</sub>    | 0.48       | 0.58       |
| R <sup>2</sup>        | 0.98       | 0.98       |
| <b>Langmuir</b>       |            |            |
| Q <sub>m</sub> (mg/g) | 26.9       | 64.3       |
| K <sub>L</sub>        | 0.037      | 0.010      |
| R <sup>2</sup>        | 0.91       | 0.95       |

40

41 Table S2 Results of UiO-66@MIP applied in real water sample

| Water sample | Spiked concentration (mg/L) | Measured concentration (mg/L) | Recovery (%) | RSD (% , n=3) |
|--------------|-----------------------------|-------------------------------|--------------|---------------|
| 1            | 0                           | 0.45                          | /            | 1.9           |
| 2            | 1                           | 1.43                          | 98.1         | 2.1           |
| 3            | 3                           | 3.40                          | 98.3         | 5.5           |
| 4            | 5                           | 5.29                          | 96.7         | 4.4           |

42
